# Supplementary material for: Highly Efficient Synthesis of Chlorogenic Acid Oleyl Alcohol Ester under Non-Catalytic and Solvent-Free Conditions
Source: MDPI journal article supplement (doi:10.3390/molecules28093948), 2023-05-08
Supplement: s1 [file s1]

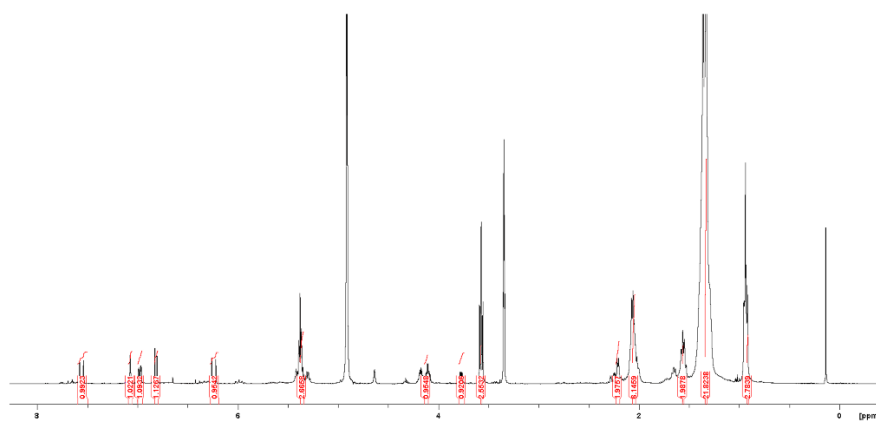

**Figure S1.** The  $^1\text{H}$  NMR spectra of CGOA.

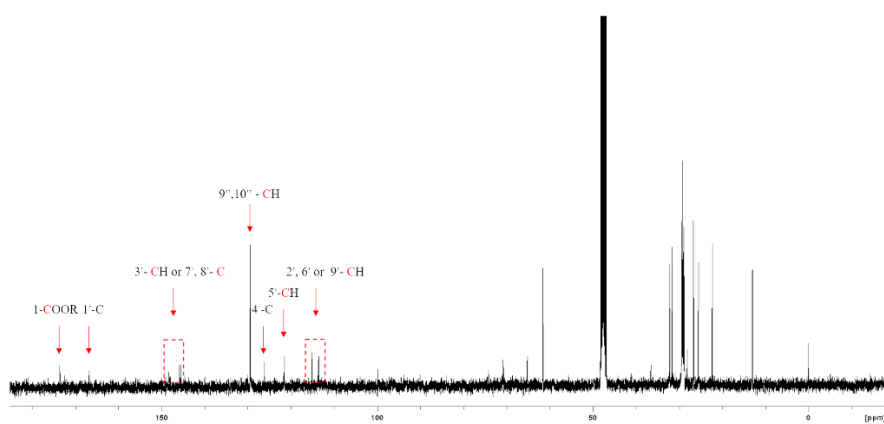

**Figure S2.** The  $^{13}\text{C}$  NMR spectra of CGOA.

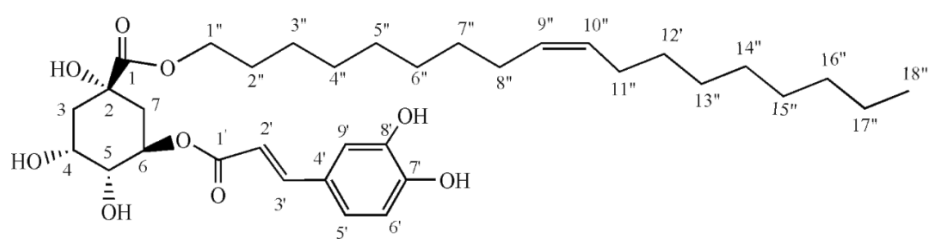

**Figure S3.** The chemical structure of CGOA.

**Table S1.** NMR characteristics of the  $^1\text{H}$  and  $^{13}\text{C}$  of CGA and CGOA.

| No. | CGA          |                 | CGOA         |                 |
|-----|--------------|-----------------|--------------|-----------------|
|     | $^1\text{H}$ | $^{13}\text{C}$ | $^1\text{H}$ | $^{13}\text{C}$ |
| 1   | —            | <u>175.62</u>   | —            | <u>173.63</u>   |
| 2   | —            | <u>72.04</u>    | —            | <u>99.99</u>    |
| 3   | 2.23         | <u>37.35</u>    | 2.21         | <u>36.62</u>    |
| 4   | 4.19         | <u>69.87</u>    | 4.12         | <u>65.29</u>    |
| 5   | 3.75         | <u>74.72</u>    | 3.76         | <u>74.24</u>    |
| 6   | 5.35         | <u>70.57</u>    | 5.36         | <u>70.82</u>    |
| 7   | 2.07         | <u>36.81</u>    | 2.04         | <u>32.28</u>    |
| 1'  | —            | 167.26          | —            | 166.80          |
| 2'  | 6.28         | 113.84          | 6.22         | 113.74          |
| 3'  | 7.58         | 145.40          | 7.54         | 145.50          |
| 4'  | —            | 126.39          | —            | 126.20          |
| 5'  | 6.80         | 121.59          | 6.80         | 121.58          |
| 6'  | 6.97         | 115.07          | 6.96         | 115.12          |
| 7'  | —            | 145.69          | —            | 145.86          |
| 8'  | —            | 148.18          | —            | 148.34          |
| 9'  | 7.07         | 113.79          | 7.07         | 113.59          |
| 1"  | —            | —               | 3.56         | 61.61           |
| 2"  | —            | —               | 1.56         | 31.67           |
| 3"  | —            | —               | 1.33         | 25.54           |
| 4"  | —            | —               | 1.33         | 29.06           |
| 5"  | —            | —               | 1.33         | 29.37           |
| 6"  | —            | —               | 1.33         | 29.22           |
| 7"  | —            | —               | 1.33         | 28.92           |
| 8"  | —            | —               | 2.04         | 26.72           |
| 9"  | —            | —               | 5.36         | 129.44          |
| 10" | —            | —               | 5.36         | 129.45          |
| 11" | —            | —               | 2.04         | 26.74           |
| 12" | —            | —               | 1.33         | 28.94           |
| 13" | —            | —               | 1.33         | 29.42           |
| 14" | —            | —               | 1.33         | 29.45           |
| 15" | —            | —               | 1.33         | 29.25           |
| 16" | —            | —               | 1.33         | 29.46           |
| 17" | —            | —               | 1.33         | 22.35           |
| 18" | —            | —               | 0.92         | 13.07           |

- Indicates that this C atom is not connected to -H, or not exist.

The difference in shifts of carbonyl atoms was underlined.
